# Supplementary material for: Highly selective hydrogenation of halogenated nitroarenes over Ru/CN nanocomposites by in situ pyrolysis
Source: Royal Society of Chemistry journal article supplement (doi:10.1039/d0nj02165b), 2020-01-01
Supplement: d0nj02165b1.pdf [file d0nj02165b1.pdf]

## Supporting Information

### Highly Selective Hydrogenation of Halogenated Nitroarenes over Ru/CN Nanocomposites by *in situ* Pyrolysis Route

Shengnan Yue<sup>a</sup>, Xueguang Wang<sup>a,\*</sup>, Shaoting Li<sup>a</sup>, Yao Sheng<sup>a</sup>, Xiujing Zou<sup>a</sup>, Xionggang Lu<sup>a</sup>,  
Chunlei Zhang<sup>b,\*</sup>

<sup>a</sup> State Key Laboratory of Advanced Special Steel, School of Materials Science and Engineering, Shanghai University, Shanghai 200444, China

<sup>b</sup> Education Ministry Key Lab of Resource Chemistry, Shanghai Key Laboratory of Rare Earth Functional Materials, College of Chemistry and Materials Science, Shanghai Normal University, Shanghai 200234, China

E-mail: wxg228@shu.edu.cn (X. G. Wang); zhangchunlei@shnu.edu.cn (C. L. Zhang)

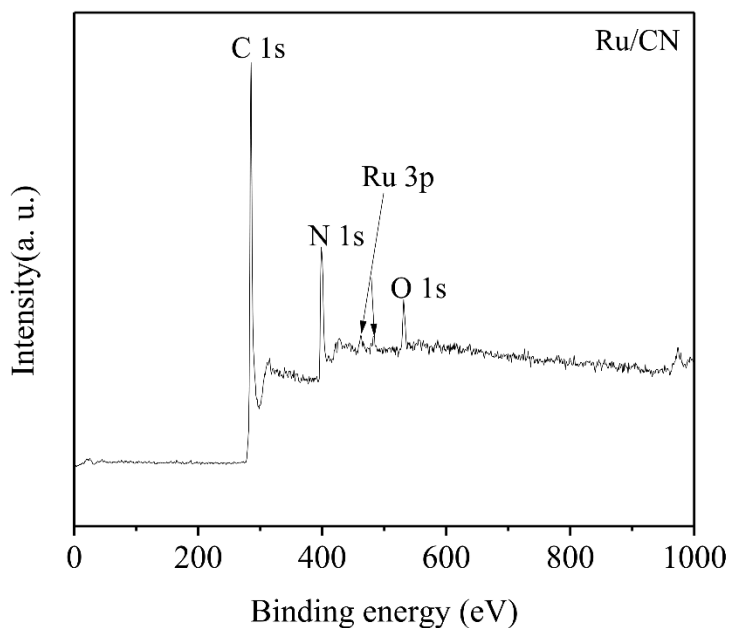

**Fig. S1** The XPS full spectrum of Ru/CN catalyst.

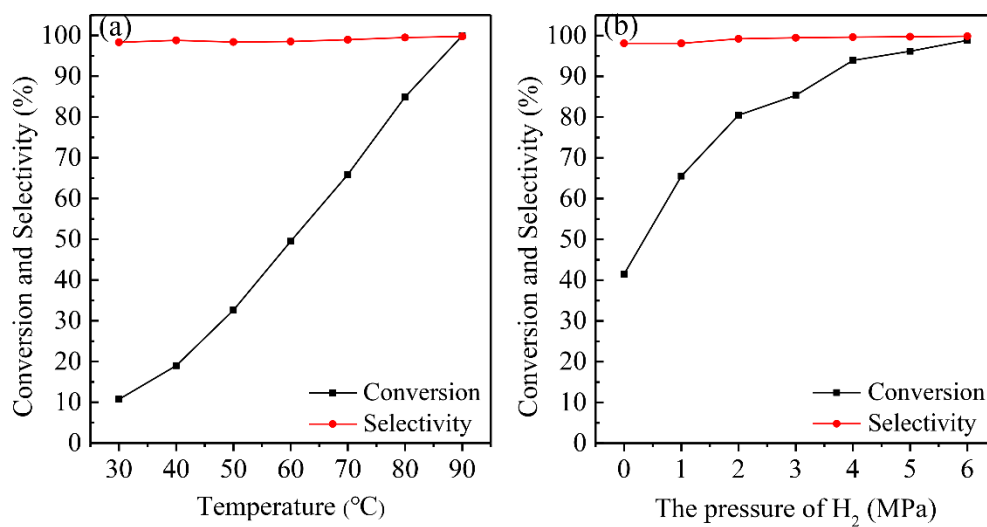

**Fig. S2** The influences of (a) reaction temperature and (b) pressure on the Ru/CN catalyst.
